# Supplementary material for: Analysis of the Output Characteristics of a Vertical Photovoltaic System Based on Operational Data: A Case Study in Republic of Korea
Source: MDPI journal article supplement (doi:10.3390/en16196971), 2023-10-06

# Agrivoltaics based on vertical bifacial PV

## Use cases and practice

6.5.2020

Heiko Hildebrandt

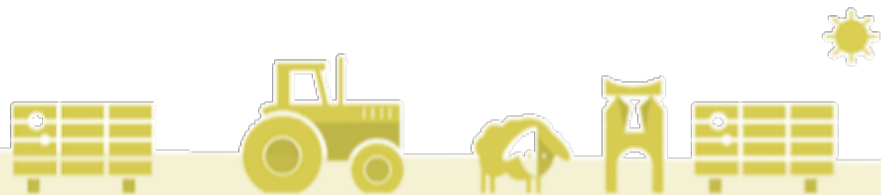

# Agenda

## N2S vertical bifacial: Basics

Use Case: Maintaining lang use

Use Case: Limited grid connection

Use Case: Fencing

Best practice: Solarpark Wellingen

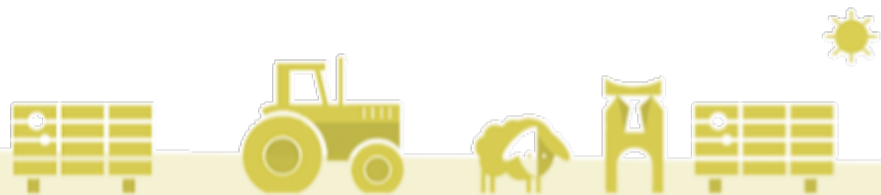

# Vertical bifacial Next2Sun PV plant at Donaueschingen (4,1 MW)

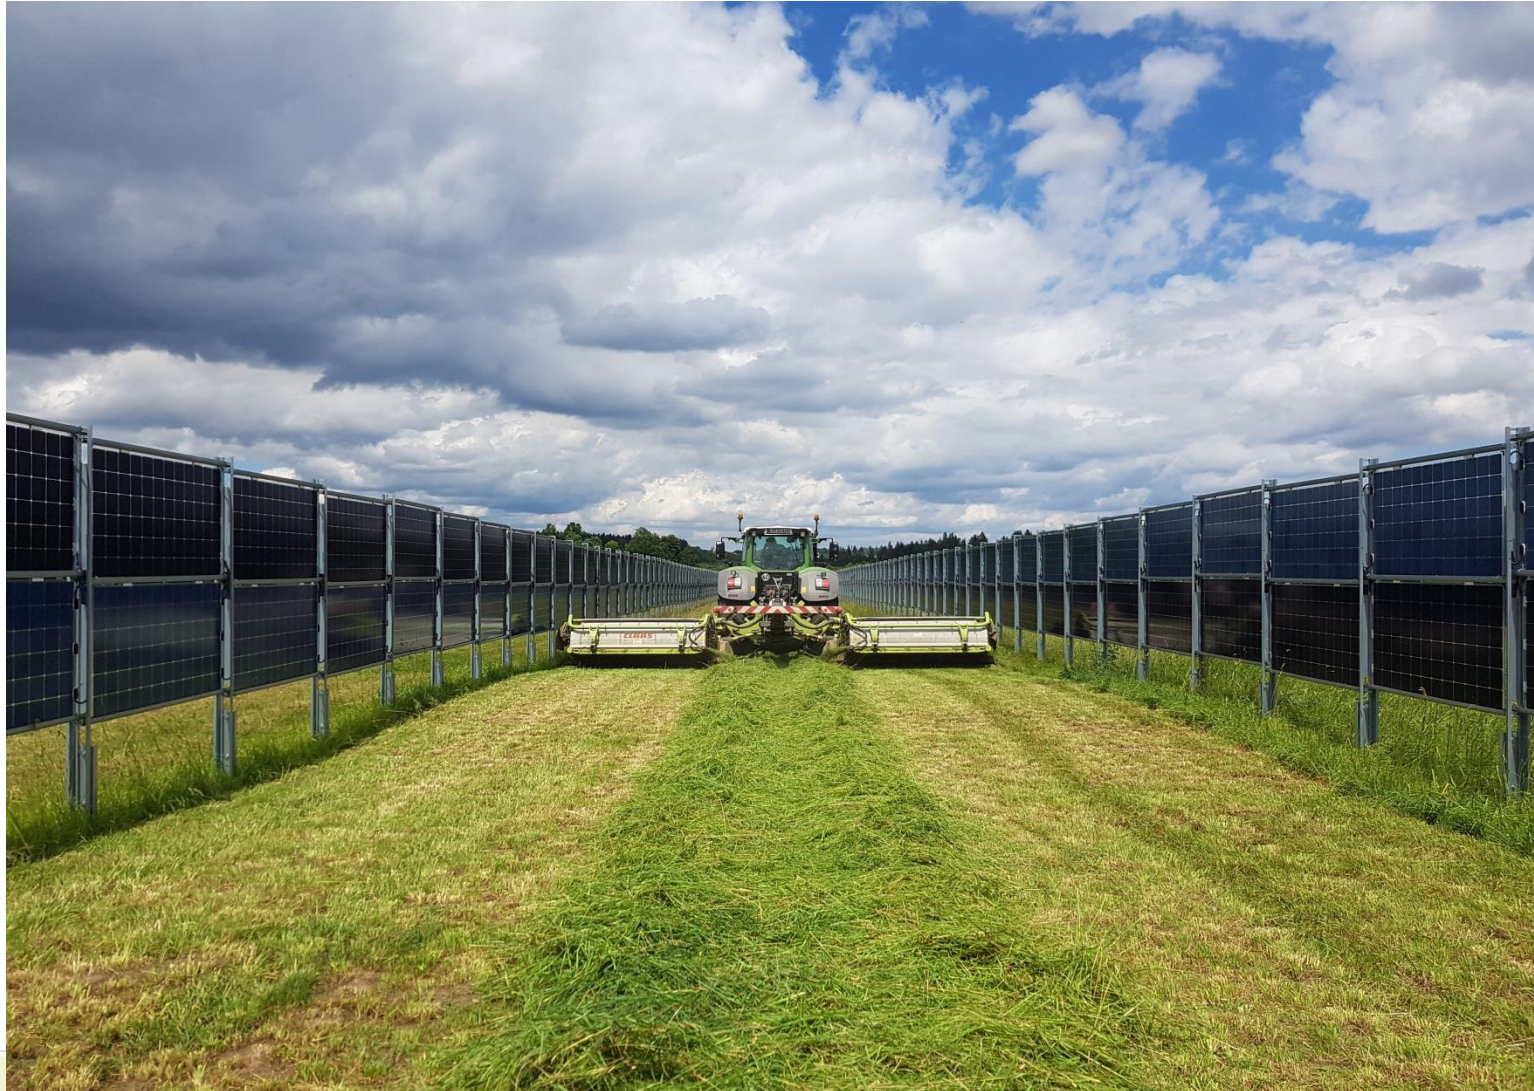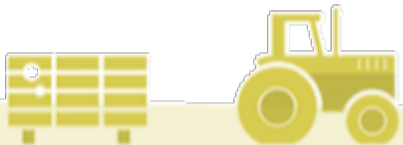

# Schematic view on a Next2Sun PV plant

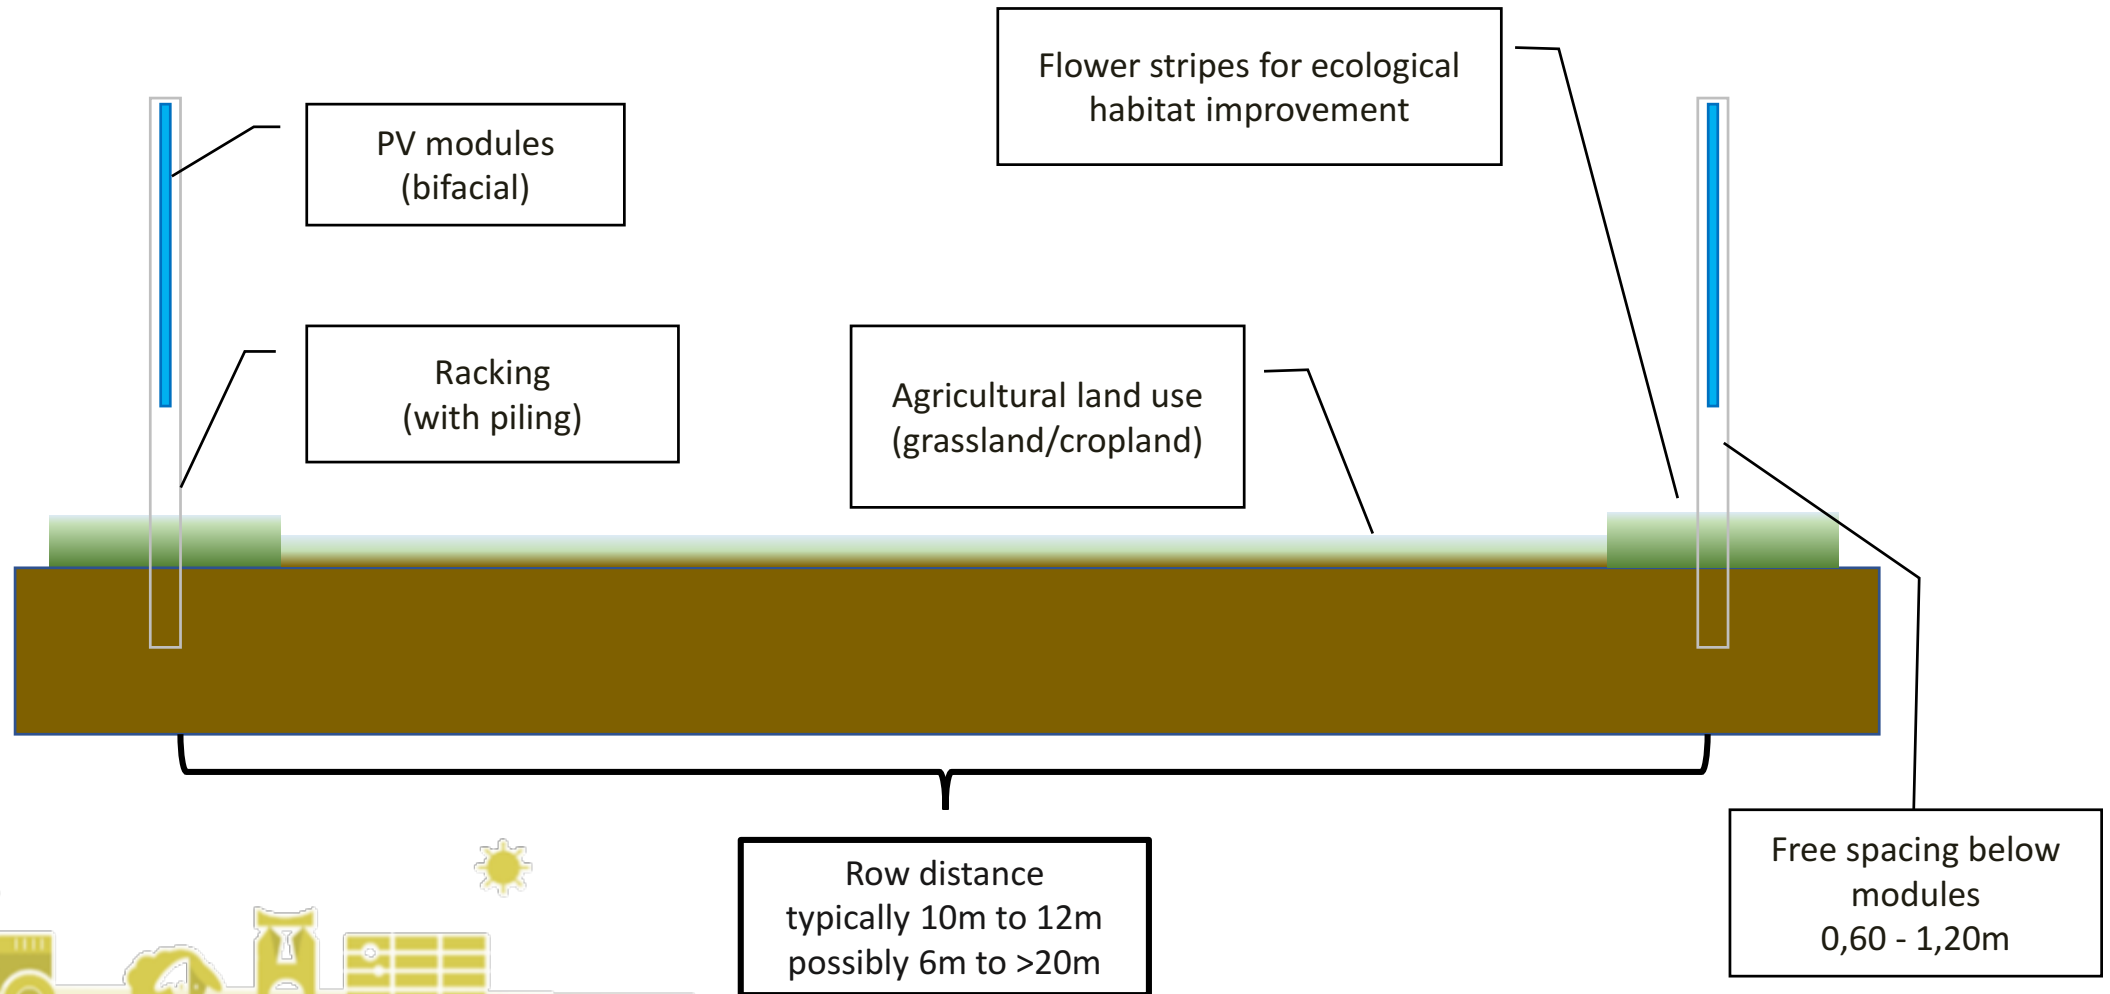



# Comparison N2S vs. conventional PV

- **Specific yield** is typically 5-10% higher for vertical E-W than for conventional PV (South, 20°)
- **Installed power** on a given overplanned area is by a factor 2-3 lower than for conventional PV, due to large row spacings
- **The effective land consumption** (m<sup>2</sup> land consumption per m<sup>2</sup> module area) goes down from ~2,00 to ~0,50 to 0,005 (depending on the definition)
- **The effective market value per kWh** is about 0,3 ct/kWh higher than for conventional PV



# Agenda

N2S vertical bifacial: Basics

**Use Case: Maintaining lang use**

Use Case: Limited grid connection

Use Case: Fencing

Best practice: Solarpark Welling



# Use Case: Maintaining land use

- **Vertical bifacial Agri-PV** allows for using agricultural land for PV - without ceasing agricultural use
- Reference: Conventional PV on a given area
  - PV Power  $\sim 1\text{MW/ha}$ , agricultural use no longer possible
- Agri-PV: Vertical bifacial PV on the same area
  - Power  $\sim 0,4\text{ MW/ha}$ , agricultural use can be maintained
  - Grassland use (pature, silage, hay) with very few restrictions, and better agricultural yield in many cases
  - Cropland use needs some adaption on both PV and agricultural sides

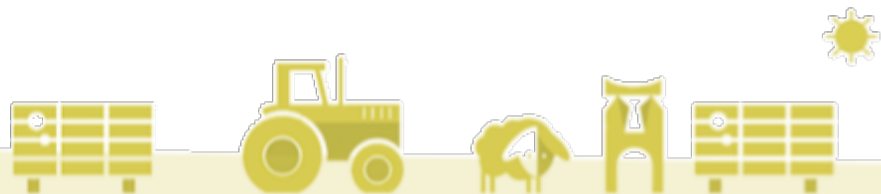

# Hay harvest SP Dirmingen 2020

## Study design:

- Sampling on 8 reference areas (area without modules) and 7 areas within the module rows.
- Three test areas next to each other within the module rows (in the middle and on both sides next to the modules).
- The growth of each area (approx. 2.50 x 10 m) is collected and weighed in a "big bag" immediately after mowing.
- Sampling from each test area (feed quality).
- One blow (approx. 7 hectares = 17,3 acres), separately managed by two farmers (Rulof, Gross).
- Only one single harvest year.

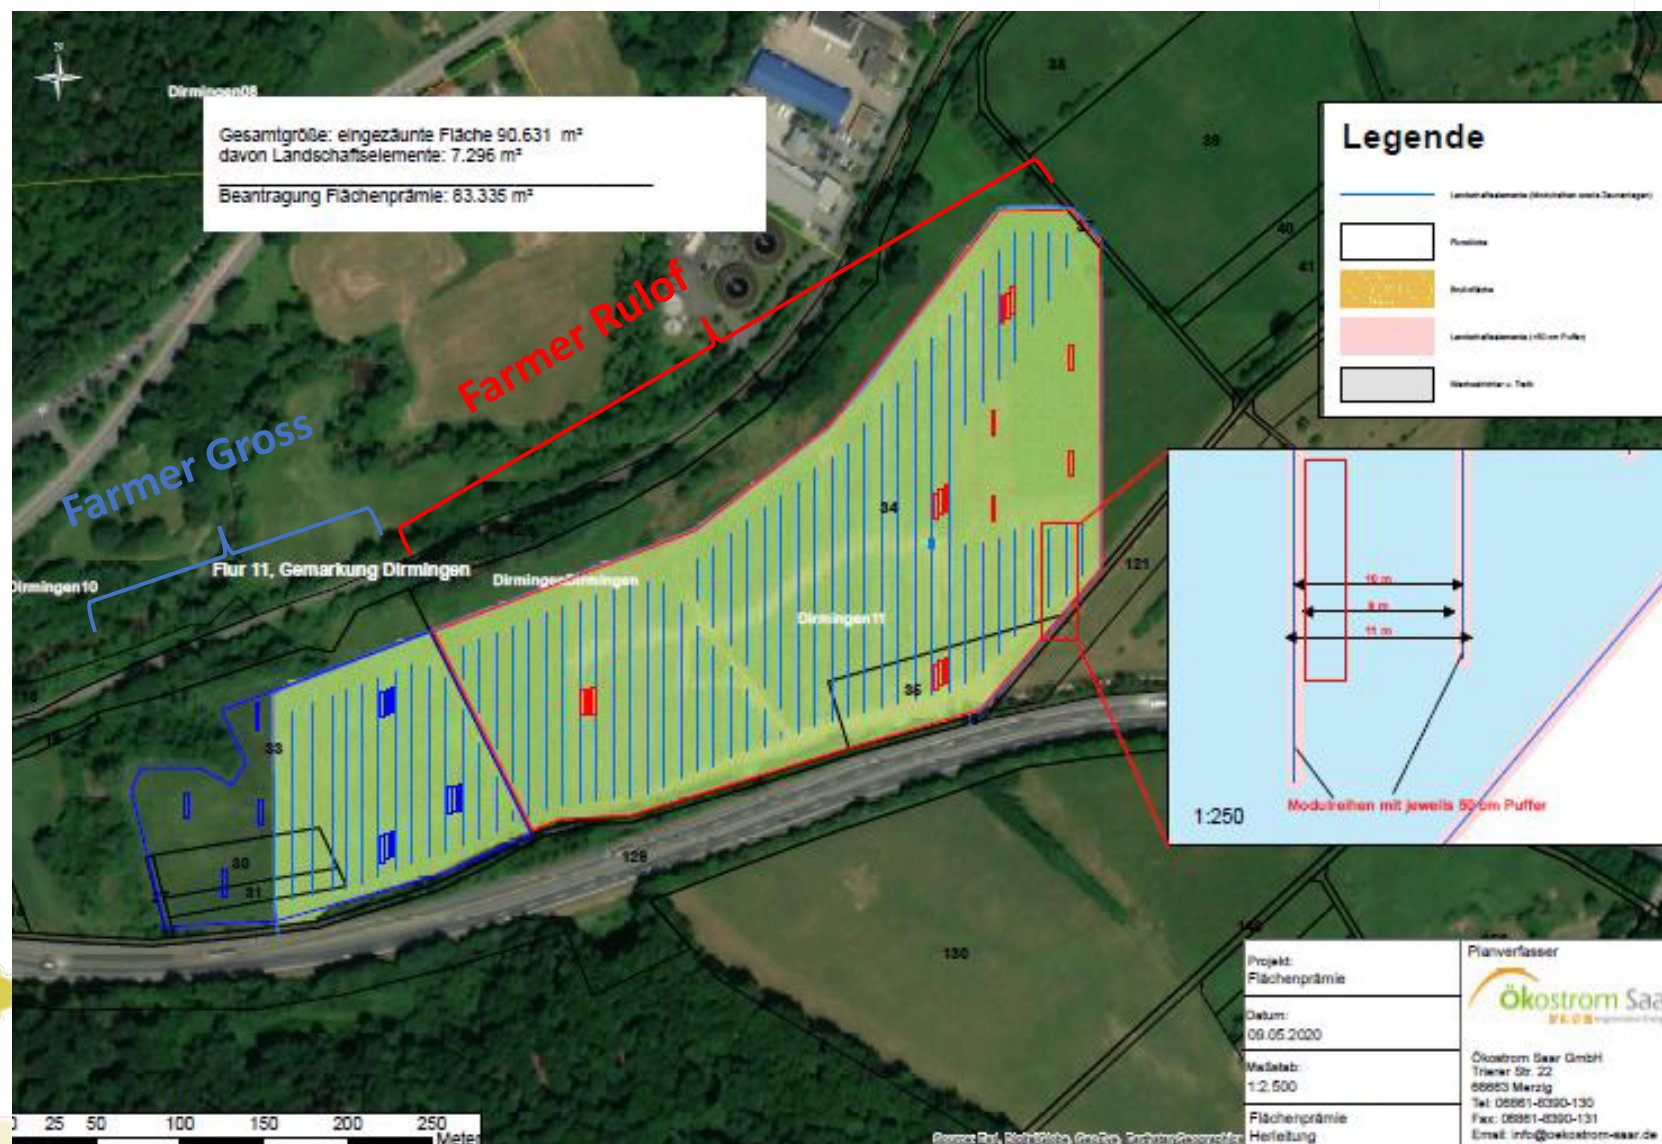

# Hay harvest SP Dirmingen 2020

## The key fact:

- Shadow from the modules leads to higher yield

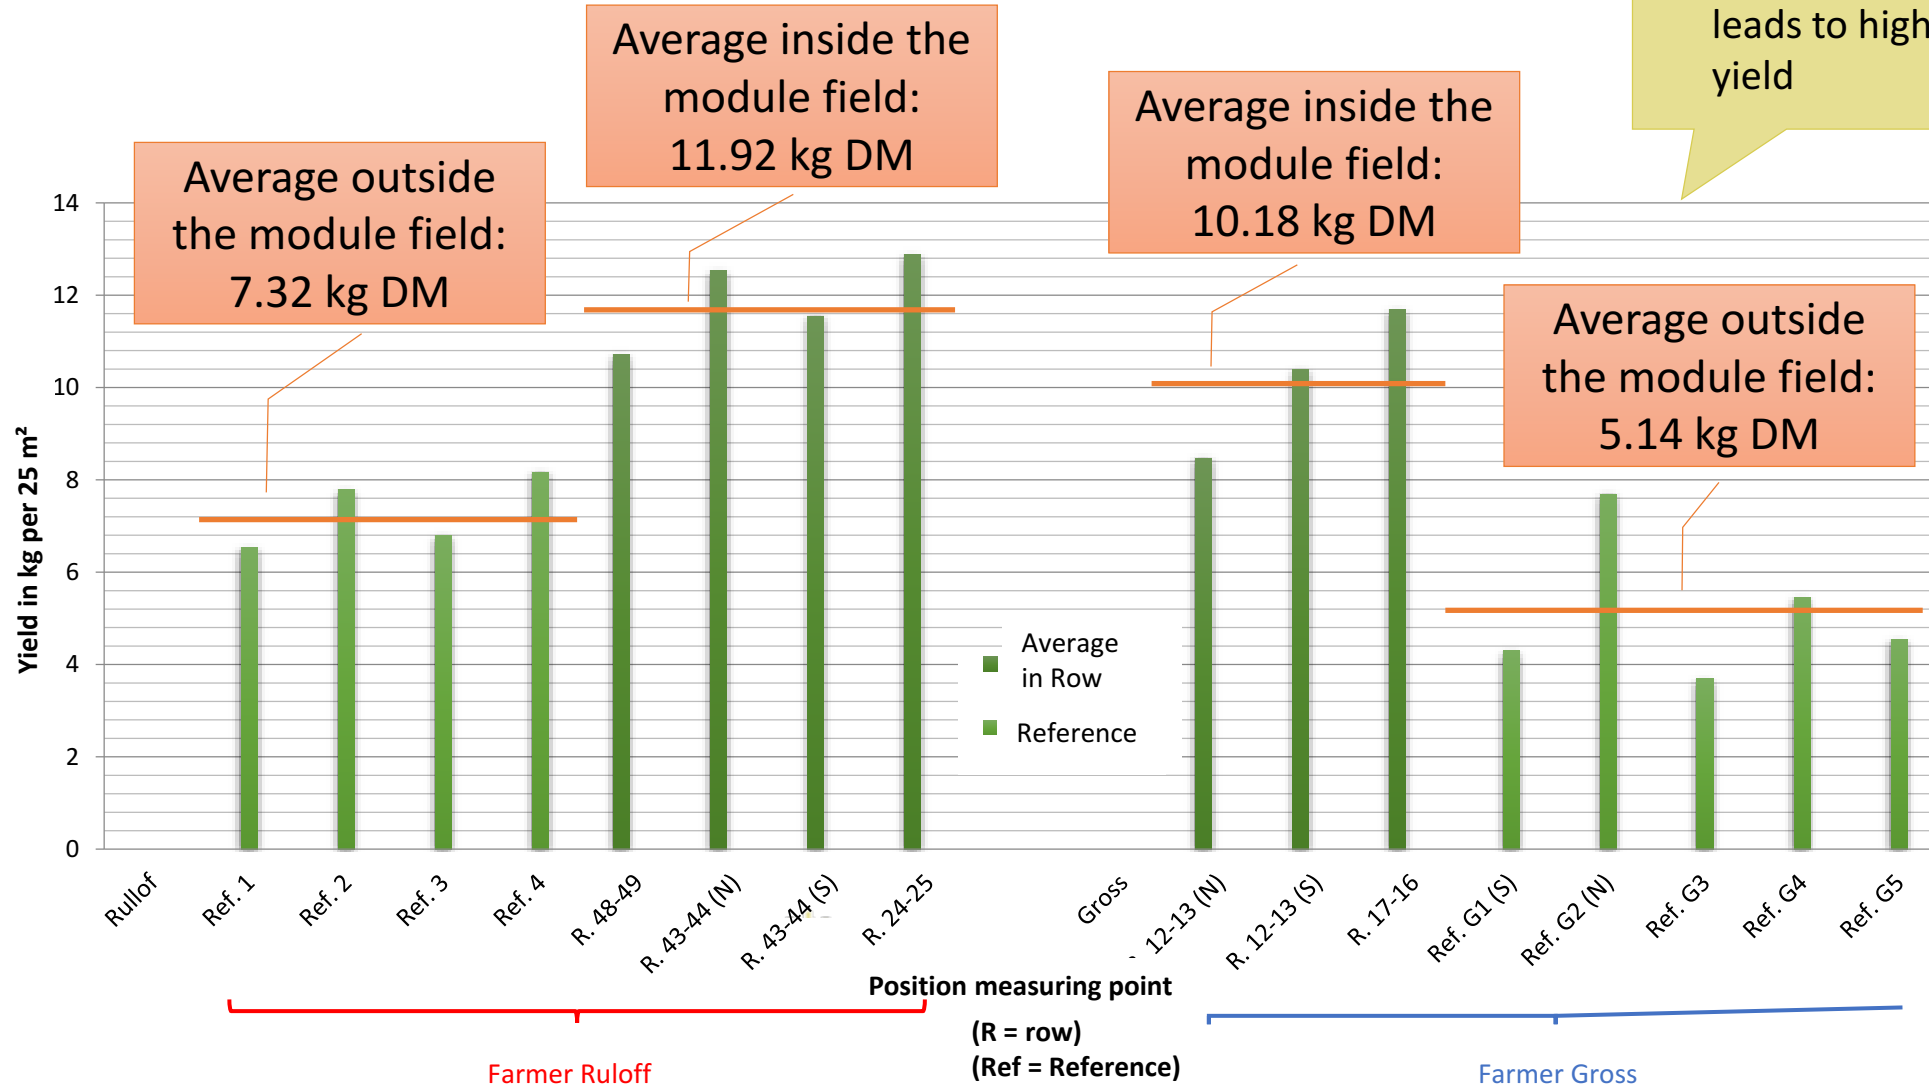

## Our results:

- Every measuring point inside the module series (average in row) is higher than every measuring point outside.
- Minimum additional hay yield (DM) inside the module field: +10%
- Average additional hay-yield (DM) inside the module field: +77 %



# Hay harvest SP Dirmingen 2020

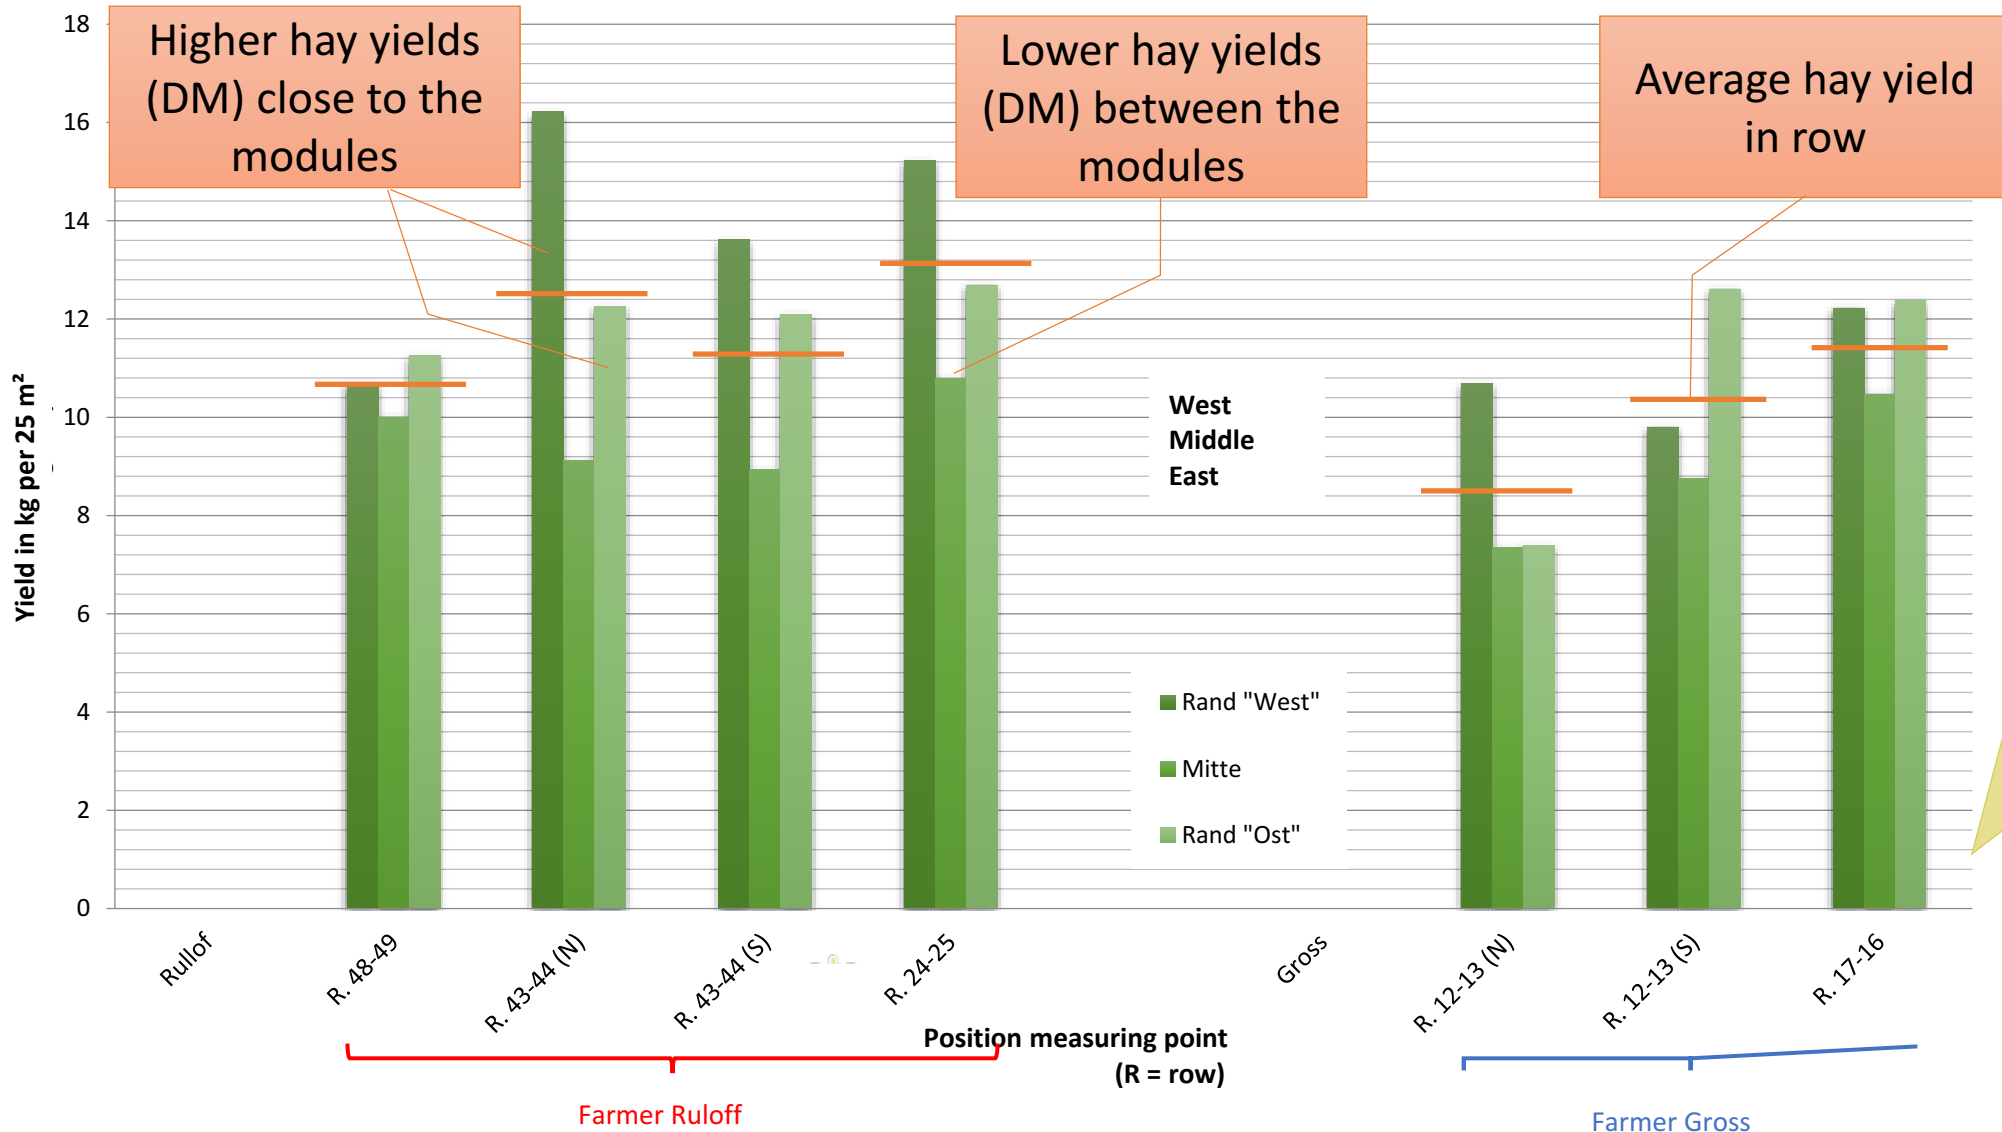

## Results only inside the module series:

- We assume higher positive shadow effects close to the modules (West & East) and lower effects in the middle.
- We need further research to find out if there are different effects of morning an evening sun.

# Agenda

N2S vertical bifacial: Basics

Use Case: Maintaining land use

**Use Case: Limited grid connection**

Use Case: Fencing

Best practice: Solarpark Welling



# Use Case:

## Pushing the limits of grid capacity

- **The combination of different orientations** allows for connecting more PV capacity to a limited grid connection
- Reference: Conventional PV limited by grid connection power
- Step 1: Combining conventional PV with vertical E-W
  - Power +29%, overplanned area +126%, land use -77%
- Step 2: Combining different vertical Orientations
  - Power +50%, overplanned area +250%, land use -65%
- **Looking at the facts for a given grid capacity of 10 MW:**



# Limited grid: Reference

- Only conventional PV (fixed tilt, South, 20°)
- Grid capacity 10 MW means (@ cap loss < 1%)
  - 12,8 MW installed capacity
  - 13,1 GWh/a annual production
  - ~13 ha module field
- Generation profile  
(season: mid of april)

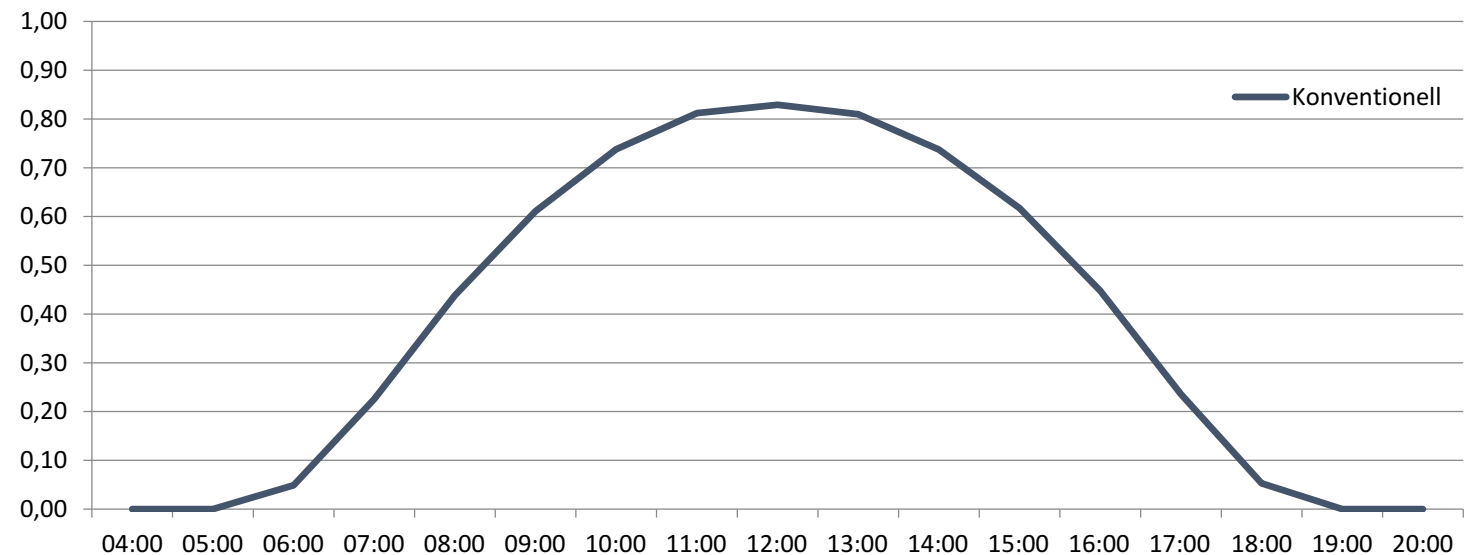

# Limited grid: Step 1 – combination

- Combination of conventional PV and vertical East-West
- Grid capacity 10 MW means (@ cap loss < 1%)
  - 16,7 MW installed capacity
  - 17,6 GWh/a annual production
  - ~29 ha module field
- Generation profile (season: mid of april)

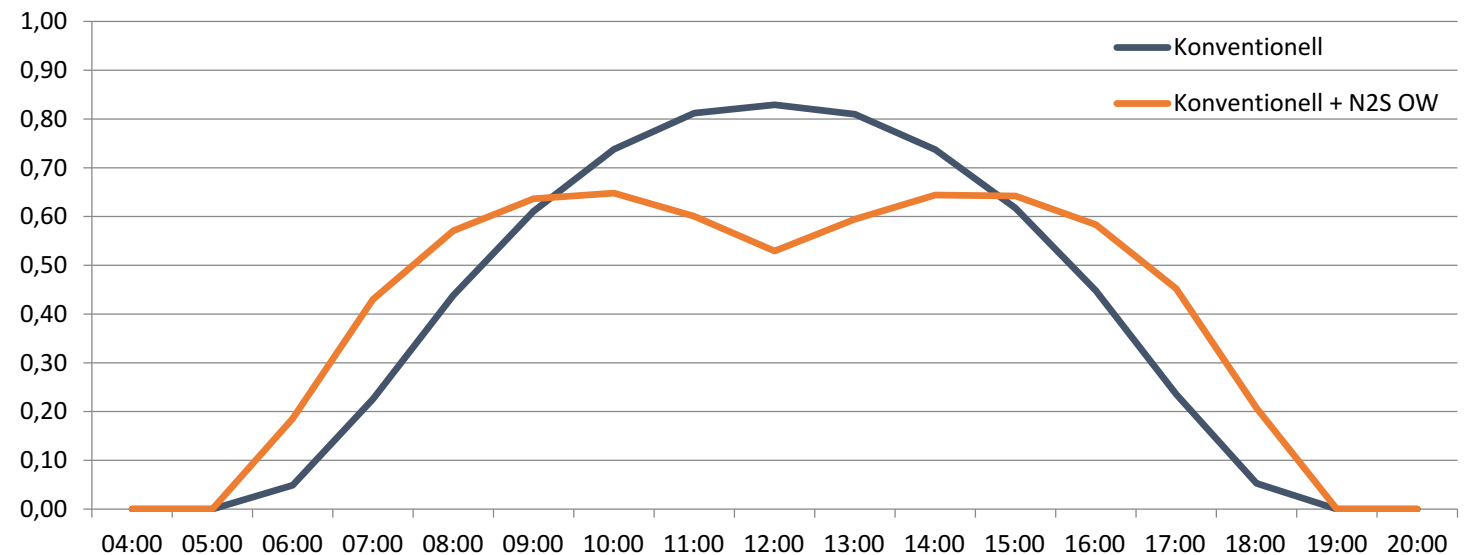



# Limited grid: Reference

- Combination of vertical SW with vertical SE
- Grid capacity 10 MW means (@ cap loss < 1%)
  - 18,2 MW installed capacity
  - 19,9 GWh/a annual production
  - ~46 ha module area
- Generation profile (season: mid of april)

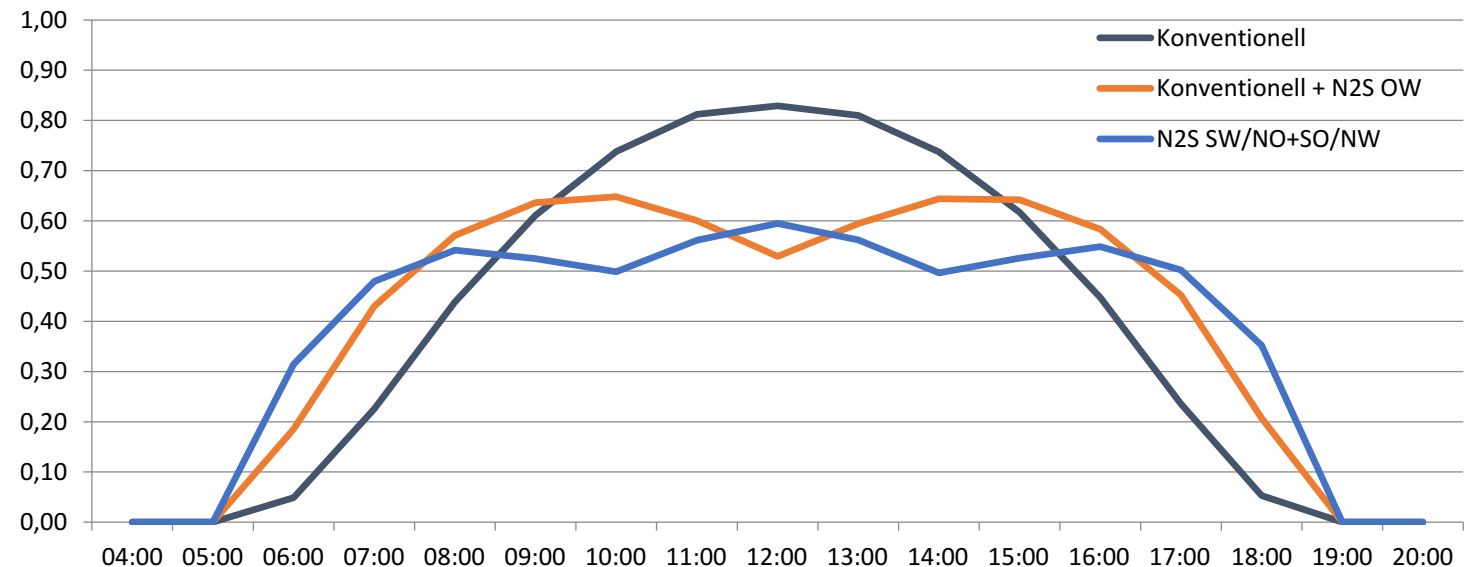

# Schematic layouts

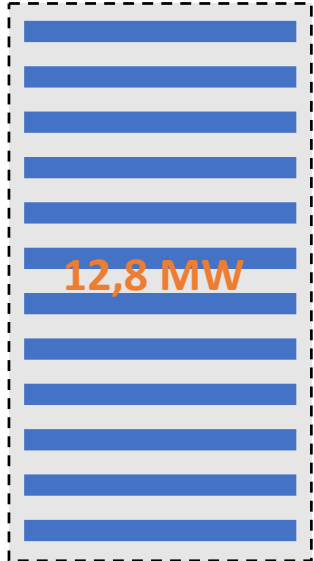

Reference:  
Conventional PV  
only

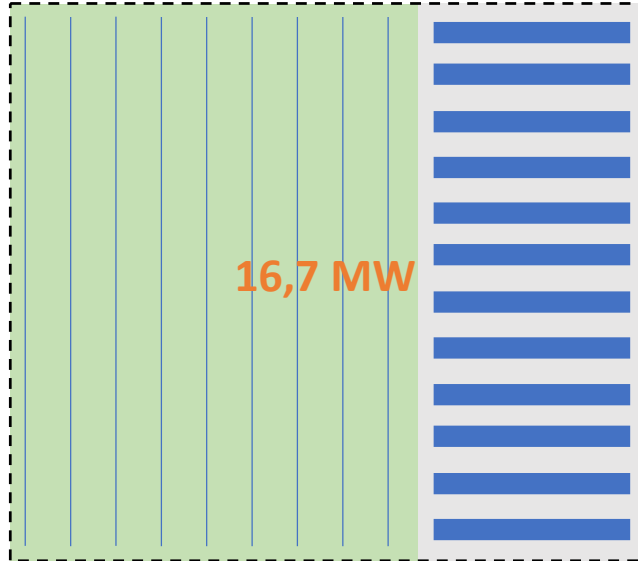

Step 1:  
Combination  
Conventional with  
vertical Agri-PV

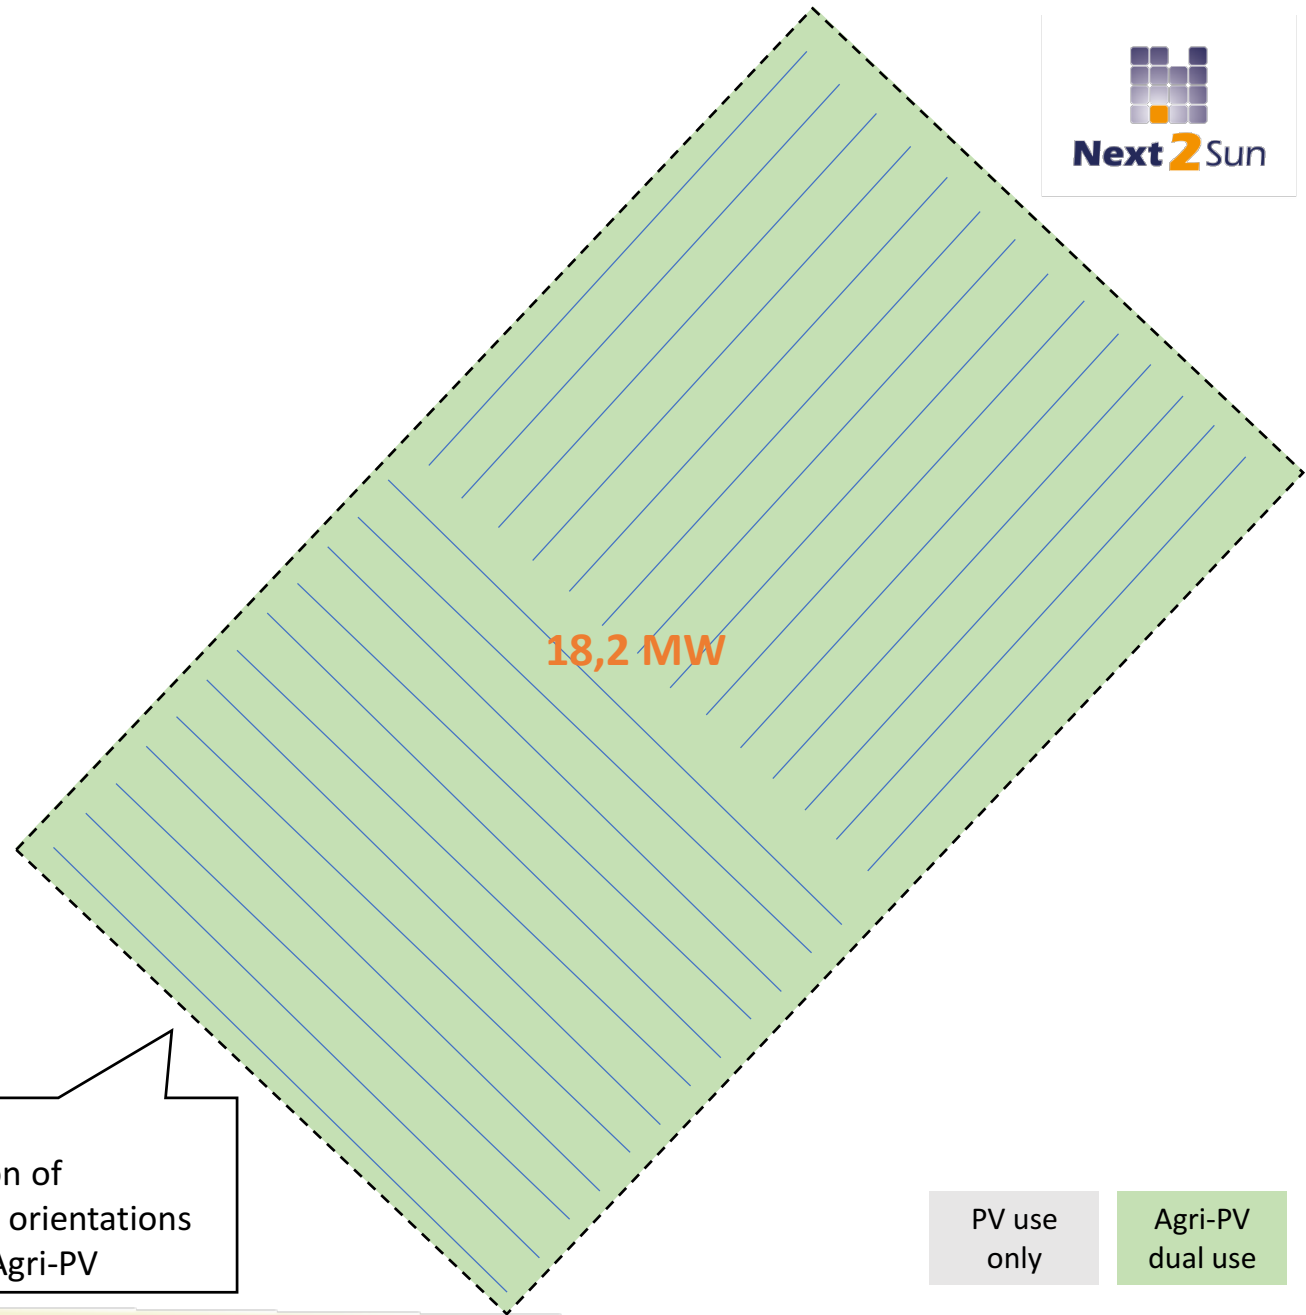

Step 2:  
Combination of  
Orthogonal orientations  
of vertical Agri-PV

PV use  
only

Agri-PV  
dual use



# Agenda

N2S vertical bifacial: Basics

Use Case: Maintaining land use

Use Case: Limited grid connection

**Use Case: Fencing**

Best practice: Solarpark Welling



# Solar Fence: Combining Fencing and Power generation

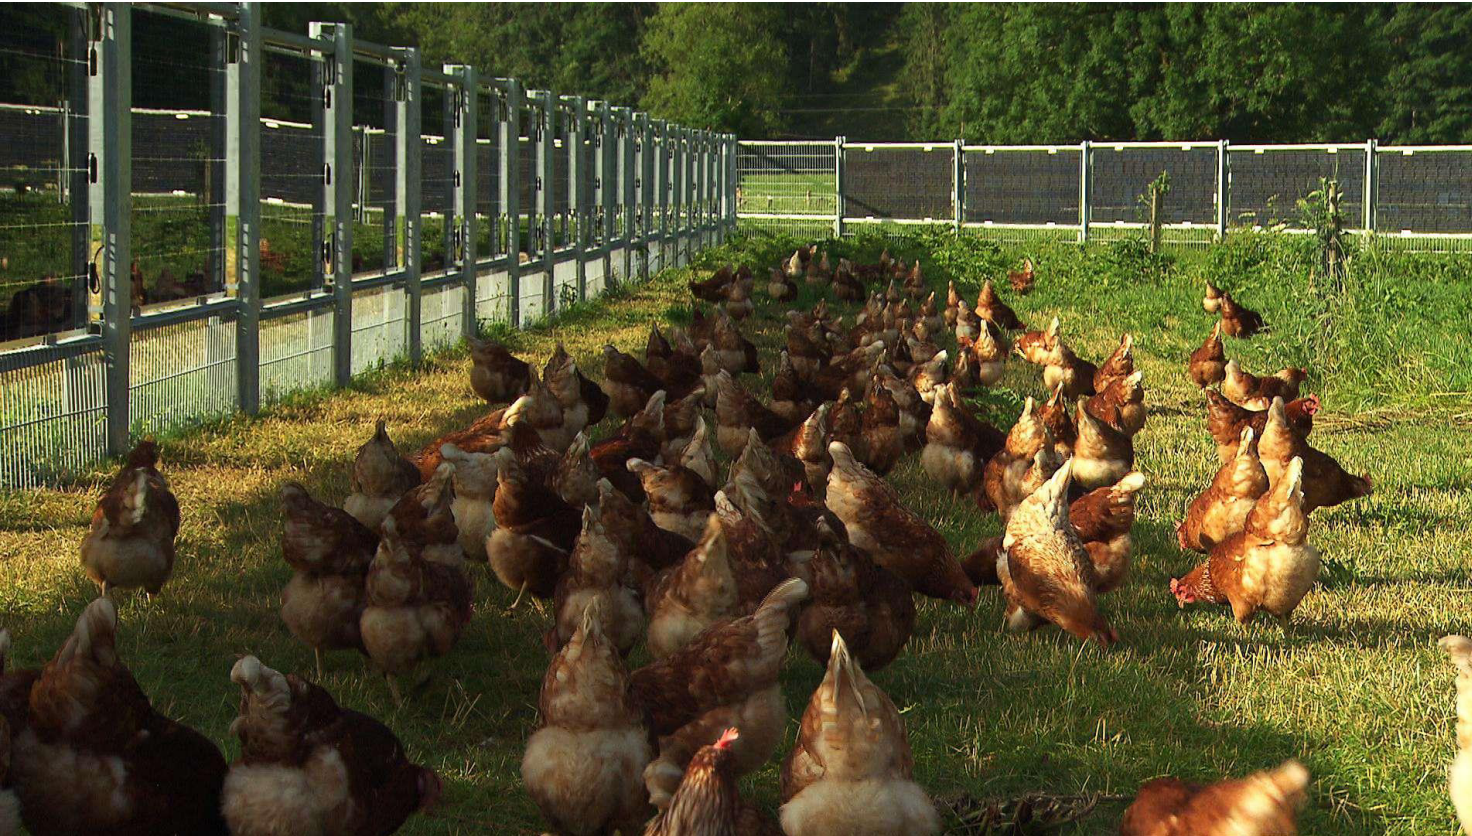

- Adding power to
  - Farms
  - PV plants
  - Industrial/commercial sites
- No additional land consumption
- Saving cost for fencing
- Interesting generation profile (e.g. for own consumption)

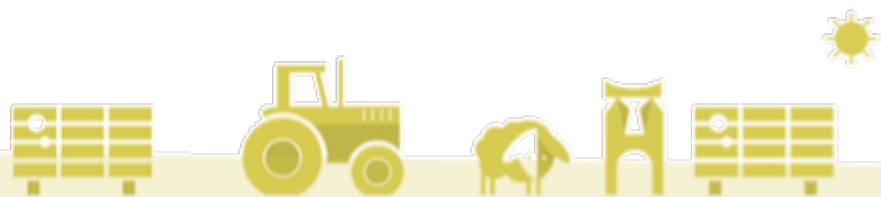



# Solar Fence: Combining Fencing and Power generation

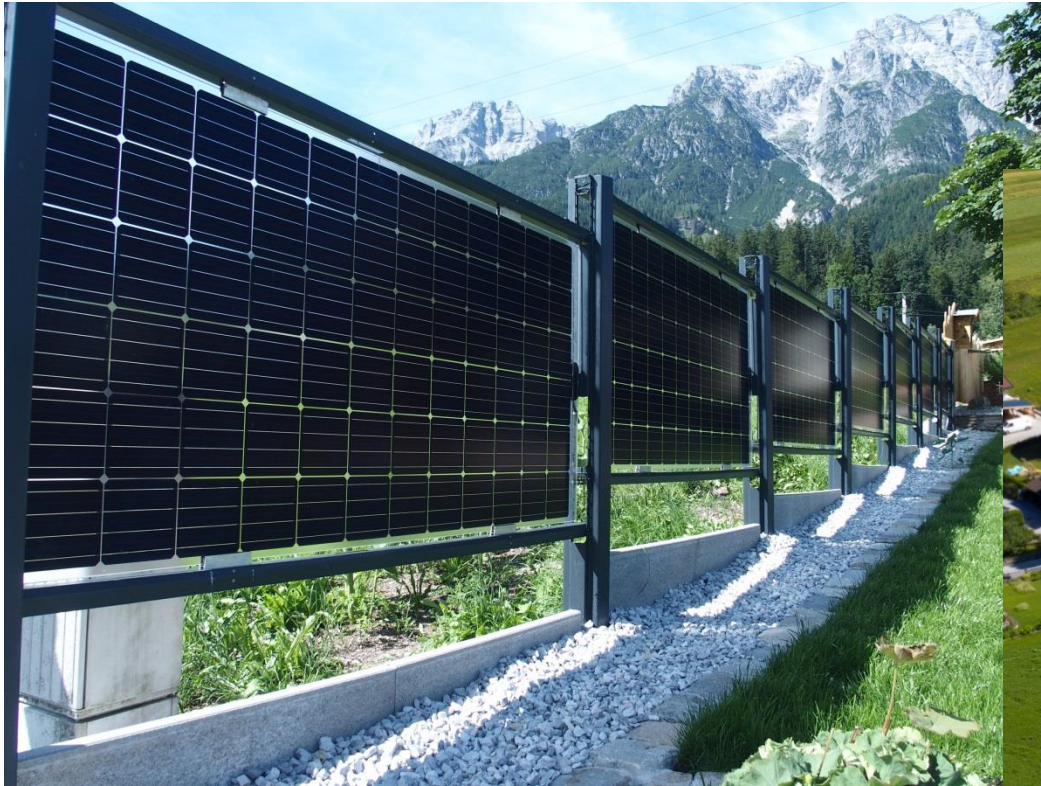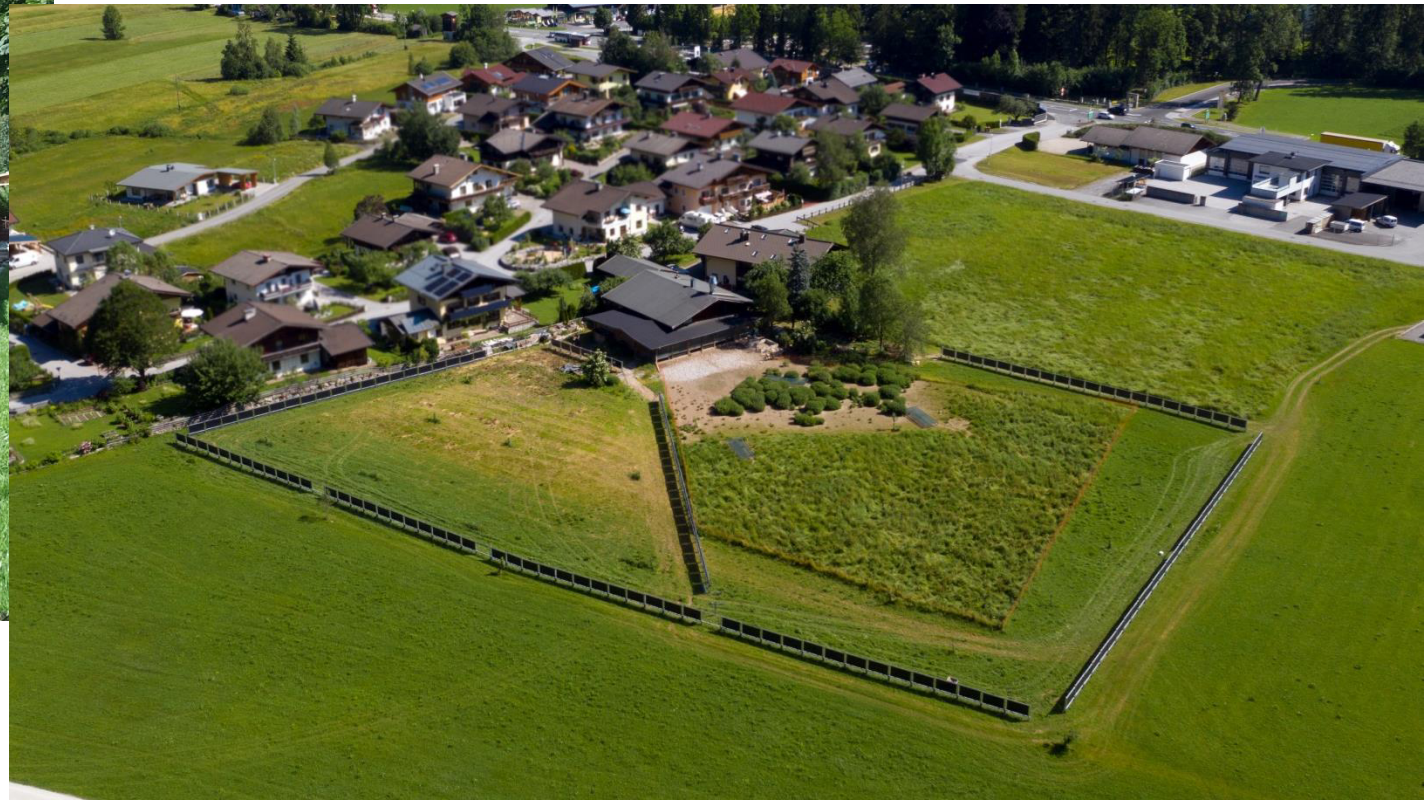



# Agenda

N2S vertical bifacial: Basics

Use Case: Maintaining land use

Use Case: Limited grid connection

Use Case: Fencing

**Best practice: Solarpark Wellingen**



# Best practice: Solarpark Welling

- Agri-PV Project in Merzig (Saarland)
  - 5 MW installed capacity
  - 5.500 MWh/a annual production
  - 13 ha module area
- Realisation in Q3-2021
- First N2S plant on cropland
- Agricultural use:
  - 10 ha lucerne grass for animal feeding
  - 2 ha experimental area (different crops, research studies)



# Layout plan

## Fencing

- Last „full“ row is used as „Solar fence“
- Some rows stay outside the fenced area

## Western part (2 ha):

- Orientation follows the direction of agricultural use
- Test field for cropland use

## Eastern part (11 ha):

- Orientation exactly East-West
- Agricultural use: lucerne grass

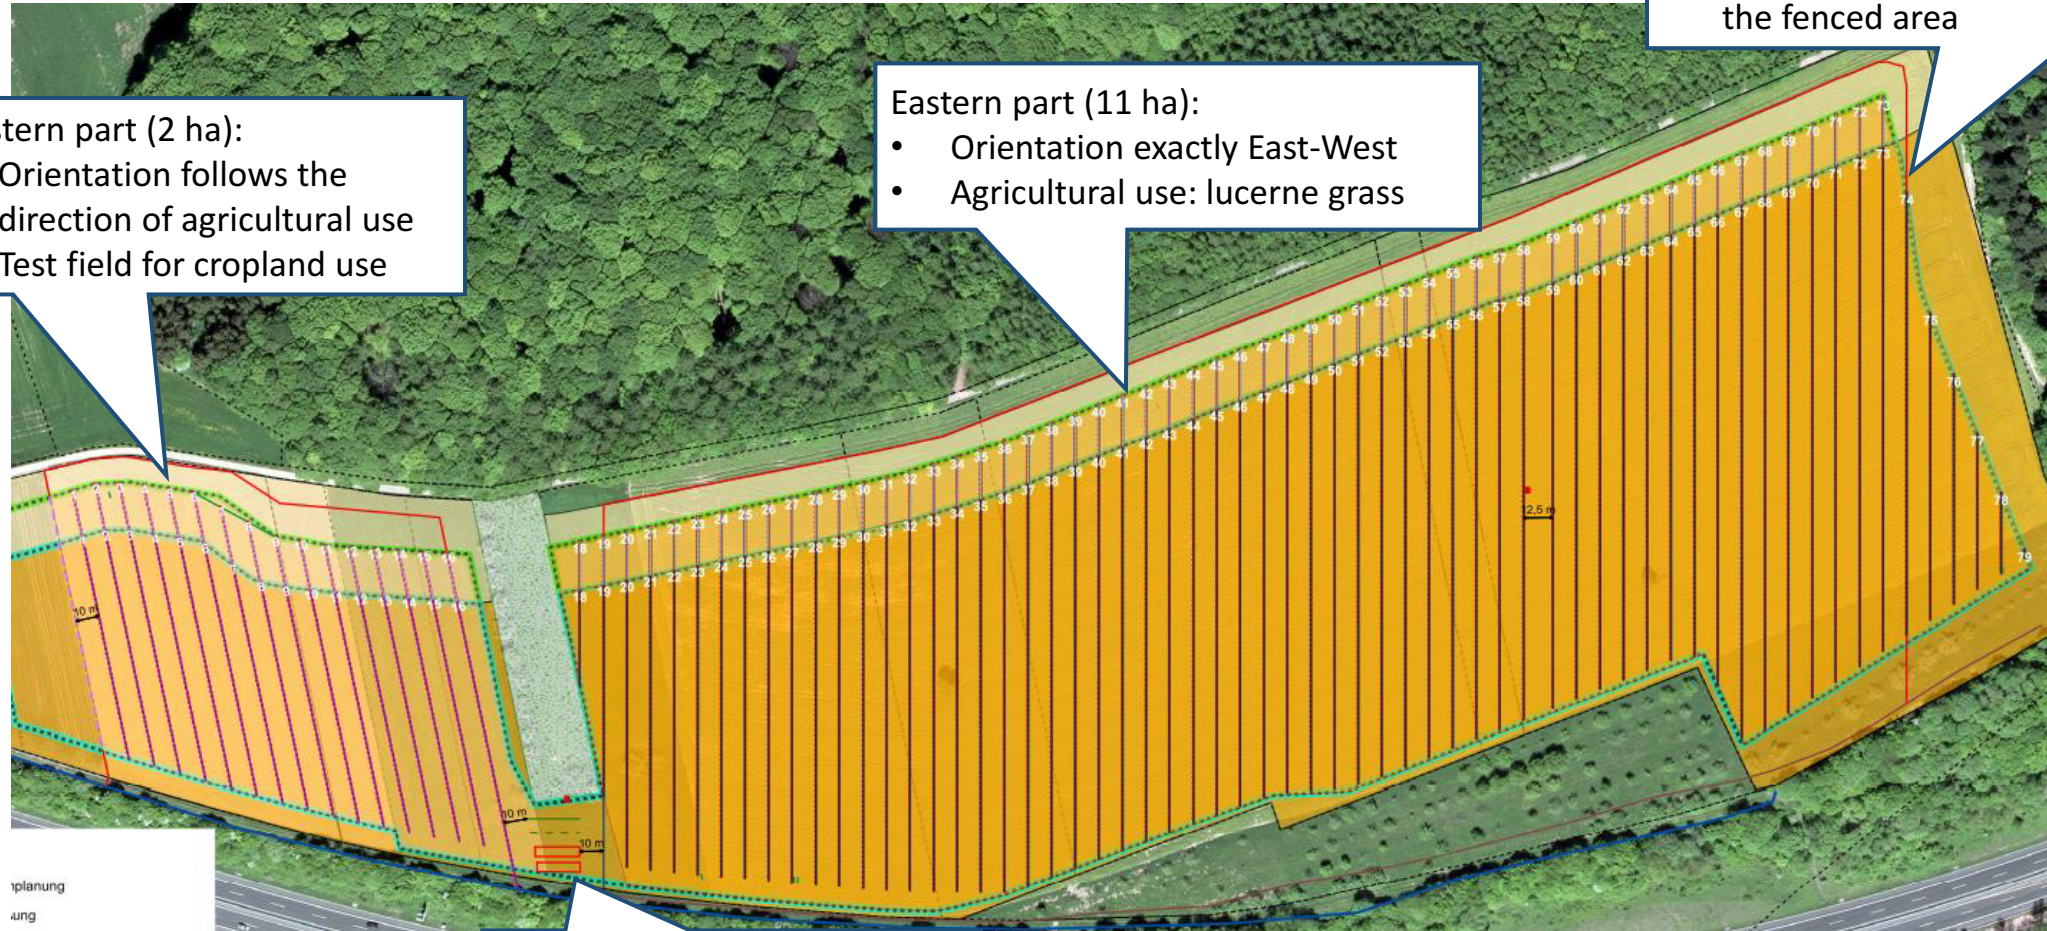

## PV test field:

Gathering reference data

- N2S South-North
- Conventional PV

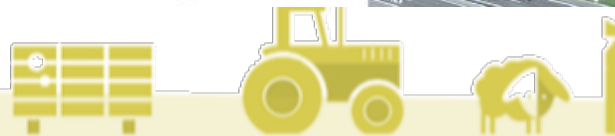

# Economies & Comparison

| Size: 5 MW                           | Conventional plant<br>(reference values) | Next2Sun<br>SP Wellingen              | Comments                                             |
|--------------------------------------|------------------------------------------|---------------------------------------|------------------------------------------------------|
| CAPEX (turnkey)                      | 2,75M ~550 €/kW                          | <b>3,3M ~630 €/kW</b>                 | Additional cost: Modules&Racking                     |
| Annual yield                         | 1.050 kWh/kW                             | <b>1.150 kWh/kW</b>                   | based on HJT cell technology                         |
| Revenues per kWh                     | fixed feed-in-tariff<br>~289k p.a.       | <b>FIT+ 0,3 ct/kWh<br/>~334k p.a.</b> | Higher revenue based on hourly EEX prices            |
| Agricultural land loss               | 6 - 7 ha                                 | <b>1,3 ha</b>                         | 90% of the field can still be used                   |
| Overall OPEX<br>of which: land lease | ~65k p.a.<br>~12k p.a.                   | <b>~67k p.a.<br/>~18k p.a.</b>        | Less greenkeeping&cleaning<br>More land lease (abs.) |
| Gross profit                         | ~224k p.a.                               | <b>~267k p.a.</b>                     |                                                      |
| IRR on equity (20a)                  | ~4,5%                                    | <b>~4,5%</b>                          |                                                      |
| Lifetime                             | 30 yr                                    | <b>30-40 yr</b>                       | Using glass-glass modules                            |

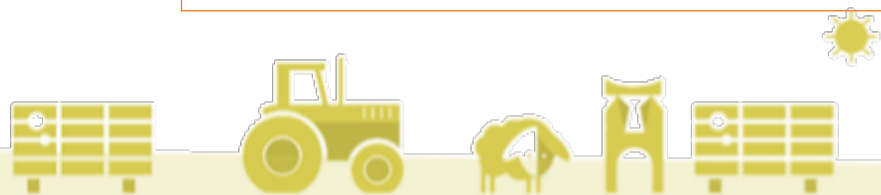

# Thank you for your attention!

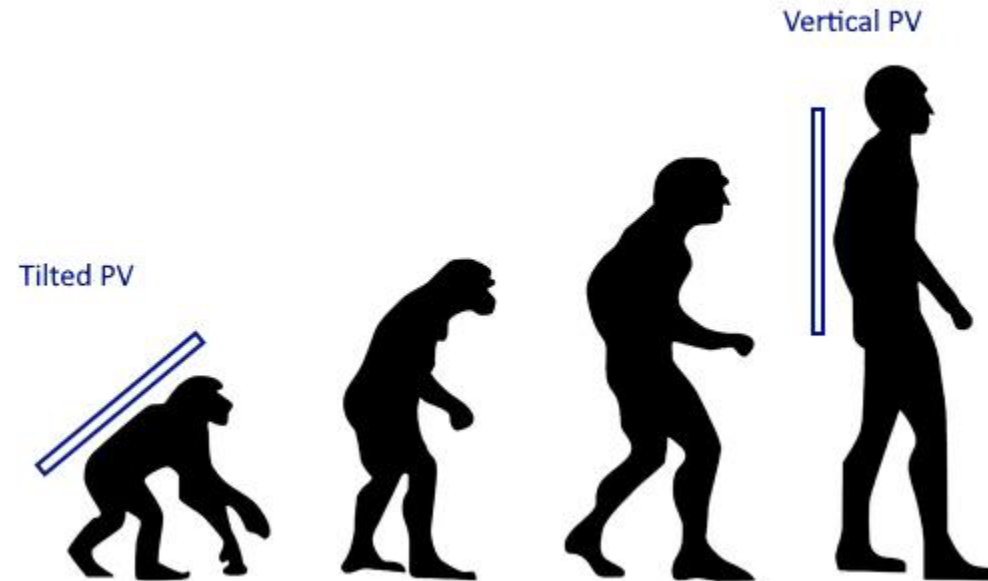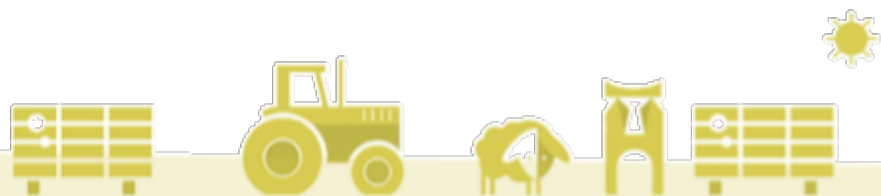

Supplement: s1 [file s1]
